# Supplementary material
Source: PubMed Central journal article supplement (PMC5846199)

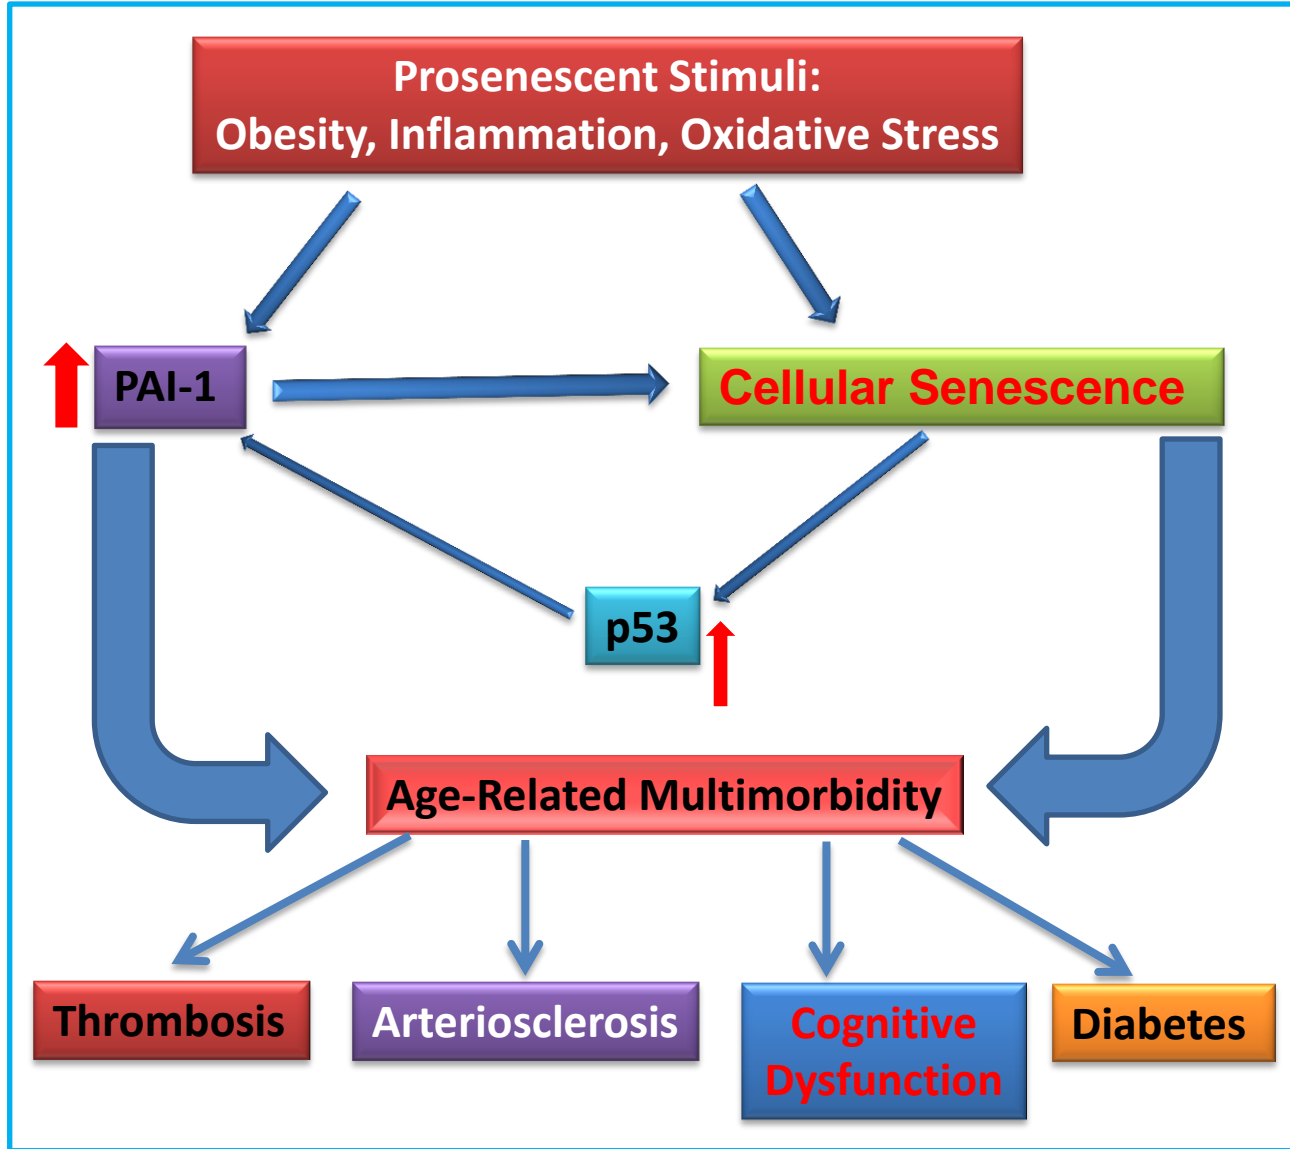

Supplement: NIHMS878825-supplement-Graphic_Abstract.pdf [file NIHMS878825-supplement-Graphic_Abstract.pdf]
